# Supplementary material
Source: ML conference proceedings conference paper supplement (https://openreview.net/forum?id=WLZmO6eFXR)
Supplement: supplementary_material [file attachment]

## A Platform

The [redacted] platform and its sister platform [redacted] are available free of charge. Users agree to the sharing of their input for research purposes. For a screenshot of the [redacted] user interface, see Figure 1.

## B Limitations

Dictionary look-up events are rare, sparse, and noisy. While DLU includes more than 8,800 look-up events among 260,000 content word tokens, these features of look-up events inherently limit model performance and some applications. The additionally released chatbot-dialogue dataset is smaller, and therefore its usefulness is limited to evaluation.

Our data is exclusive to English language texts and the first languages of the learners who performed click actions are unevenly distributed (see Table 10). The same is true for CEFR levels. Further personalisation would require more even data distribution.

Due to compute restrictions, we focused on models with comparatively few parameters, although we do include evaluation on LLMs such as LLaMA-3.2-1B. Since we and others (Smădu et al., 2024) found that model size does not appear to predict model performance well, we believe that this restriction poses no major problems. Our focus is on using publicly available models, ensuring replicability.

## C Safety and Privacy Considerations

The information in the DLU data poses few risks. While we release information about learner L1 and estimated CEFR-level, personal identification is practically impossible since this information is very broad and the lookup patterns themselves are specific to the platform.

The additional chatbot-dialogue data we release should be handled with greater care, because it includes user input and the chatbot model was not filtered for sensitive content (*reference redacted for peer-review*). As described above (see Section 4), we have manually filtered the dataset and removed critical personal information about the chat participants, e.g. changing first names.

## D Dataset Description

For the overall description of the DLU dataset, see Section 3. Further description of CEFR levels and first languages (L1s) across the dataset can be found in tables 6 to 8 and 10 to 12.

|       | B2  | B1  | A2  | C1 | C2 | C2+ | sum |
|-------|-----|-----|-----|----|----|-----|-----|
| all   | 228 | 242 | 112 | 55 | 17 | 9   | 663 |
| train | 208 | 227 | 108 | 52 | 15 | 6   | 616 |
| dev   | 29  | 44  | 11  | 4  | 1  | 1   | 90  |
| test  | 26  | 10  | 11  | 14 | 4  | 3   | 68  |

Table 6: Self-reported CEFR levels of users.

|       | A   | B   | C  | UNK | sum |
|-------|-----|-----|----|-----|-----|
| all   | 135 | 324 | 35 | 169 | 663 |
| train | 123 | 302 | 34 | 157 | 616 |
| dev   | 21  | 49  | 6  | 14  | 90  |
| test  | 13  | 37  | 5  | 13  | 68  |

Table 7: CEFR levels for users as estimated by essays from [redacted]

## D.1 Format of the Data

The data is formatted as a document-level token-classification task. Tokenisation follows the [redacted] pipeline used by [redacted]. For each token a label is provided, with the default label -100 used for non-content word tokens.

### Example

Text Taco Bell restaurants decided Wednesday to remove ...  
Labels 0 0 0 0 0 -100 1 ...  
A 0 label indicates no click, a 1 a click. -100 indicates non-content word POS. A text is a document, i.e. an entire WikiNews article.

## E Ensemble Baseline

The classifiers used for the ensemble model are (using sklearn class names):

1. RandomForestClassifier
2. GradientBoostingClassifier
3. HistGradientBoostingClassifier
4. MLPClassifier
5. LogisticRegression
6. BaggingClassifier

They were combined using the sklearn VotingClassifier class, which was set to soft

|       | A   | B   | C   | UNK | sum  |
|-------|-----|-----|-----|-----|------|
| all   | 270 | 669 | 116 | 272 | 1327 |
| train | 229 | 577 | 97  | 240 | 1143 |
| dev   | 23  | 53  | 8   | 17  | 101  |
| test  | 18  | 39  | 11  | 15  | 83   |

Table 8: CEFR levels as estimated by essays from [redacted] across documents by users (i.e. some users and WikiNews articles appear more than once in this table).



Redacted for Peer Review

Figure 1: Screenshot of [redacted] platform with information provided by lookup of the word “export”.

|       | A2   | B1   | B2   | C1  | C2 | unk  | sum  |
|-------|------|------|------|-----|----|------|------|
| all   | 2102 | 2540 | 1638 | 522 | 6  | 2050 | 8858 |
| train | 1882 | 2295 | 1424 | 343 | 6  | 1872 | 7822 |
| dev   | 143  | 139  | 71   | 155 | 0  | 122  | 630  |
| test  | 77   | 106  | 143  | 24  | 0  | 56   | 406  |

Table 9: Look-up events across CEFR levels as estimated by essays from [redacted].

|       | ar | bg | ca | cs | de | en   | es | fa | fr | hi | hu  | id | it | ja | lv | ka | ml  | my | ne | pt | ro | ru  | sr | tate | tr | ur  | vi  | zh | unk | sum |
|-------|----|----|----|----|----|------|----|----|----|----|-----|----|----|----|----|----|-----|----|----|----|----|-----|----|------|----|-----|-----|----|-----|-----|
| all   | 5  | 1  | 2  | 3  | 2  | 1293 | 2  | 4  | 1  | 1  | 227 | 1  | 1  | 1  | 1  | 1  | 114 | 1  | 4  | 1  | 2  | 127 | 1  | 6    | 7  | 438 | 663 |    |     |     |
| train | 4  | 0  | 2  | 3  | 0  | 1083 | 2  | 4  | 1  | 1  | 224 | 1  | 0  | 1  | 1  | 1  | 113 | 1  | 4  | 1  | 1  | 123 | 1  | 6    | 7  | 417 | 616 |    |     |     |
| dev   | 1  | 0  | 0  | 1  | 1  | 115  | 0  | 1  | 0  | 0  | 6   | 1  | 1  | 0  | 0  | 1  | 0   | 2  | 0  | 0  | 0  | 0   | 4  | 0    | 1  | 3   | 52  | 90 |     |     |
| test  | 2  | 1  | 0  | 0  | 1  | 316  | 1  | 0  | 0  | 1  | 0   | 2  | 0  | 0  | 0  | 0  | 1   | 0  | 4  | 0  | 0  | 0   | 1  | 0    | 3  | 0   | 0   | 32 | 68  |     |

Table 10: Users per L1. For experiments, less frequent languages are merged into the unknown category (unk),

voting. No systematic hyperparameter tuning was required.

The used features were:

- The frequency baseline score as described in Section 6.
- Relative position of the token in the text, defined as the proportion of seen tokens for the first 1000 tokens.
- Proportion of look-up events by user on splits used for training.
- CEFR-level as estimated by essays submitted by the user.
- Count of definitions for the word in the *Cambridge Advanced Learner’s Dictionary*.
- Whether the word type occurred before in the text.
- Proportion of people who did not know the word type as retrieved from the ratings by Brysbaert et al. (2014).

For missing values, the average was used. To address label imbalance we upsampled positive cases to achieve a proportion of 1-to-1. For the additionally added positively labelled data, we added small Gaussian noise to the frequency score, proportion of look-up event by user, the relative position.

|       | ar | en | es  | it | pt | tr | vi | zh | unk | sum  |
|-------|----|----|-----|----|----|----|----|----|-----|------|
| all   | 12 | 19 | 169 | 70 | 29 | 48 | 10 | 15 | 955 | 1327 |
| train | 8  | 14 | 135 | 62 | 23 | 40 | 9  | 12 | 840 | 1143 |
| dev   | 1  | 2  | 16  | 6  | 2  | 5  | 1  | 3  | 65  | 101  |
| test  | 3  | 3  | 18  | 2  | 4  | 3  | 0  | 0  | 50  | 83   |

Table 11: L1s across documents seen by users (i.e. some users and articles appear multiple times in this table).

|       | ar | en | es | it | pt | tr | vi | zh | unk | sum |
|-------|----|----|----|----|----|----|----|----|-----|-----|
| all   | 5  | 12 | 93 | 27 | 14 | 27 | 6  | 7  | 472 | 663 |
| train | 4  | 10 | 83 | 24 | 13 | 23 | 6  | 7  | 446 | 616 |
| dev   | 1  | 1  | 15 | 6  | 2  | 4  | 1  | 3  | 57  | 90  |
| test  | 2  | 3  | 16 | 2  | 4  | 3  | 0  | 0  | 38  | 68  |

Table 12: L1s across users – less frequent languages merged into unknown (unk). This merging process is used for our transformer models.

| split  | chats | clicks | con.  | tokens |
|--------|-------|--------|-------|--------|
| D-chat | 25    | 5      | 10027 |        |
| D-read | 26    | 67     | 33130 |        |

Table 13: Description of data and splits, including the number of content tokens for chatbot dialogues.

## F Neural Models

The models used are described in Table 14. We used the LLaMA 3.1-8B, rather than a LLaMA 3.2 version, because it was closer to the size of the Gemma model.

| model          | hf-name                            | approach   |
|----------------|------------------------------------|------------|
| Longformer     | allenai/longformer-base-4096       | finetuning |
| LLaMA 3.2      | meta-llama/Llama-3.2-1B            | finetuning |
| LLaMA Instruct | unsloth/Meta-Llama-3.1-8B-Instruct | prompting  |
| Gemma          | unsloth/gemma-2-9b-it              | prompting  |

Table 14: Details of models used, including name on huggingface hub and experimental approach.

### F.1 Hyperparameters

The datasets for the different tasks strongly differ in input length. Both the SEP and DLU dataset operate on the document-level, but while DLU consists of WikiNews texts, the SEP consists of student essays. The 2018 CWI dataset (Yimam et al., 2017) is on the sentence level, i.e. the inputs are much shorter than for the other datasets. To work with these different datasets, we found it necessary to change the hyperparameter space, in particular the space for the training batch size.

The hyperparameter spaces as well as the selected hyperparameters are described in tables 15 to 17. For each combination of model and loss function, we run 20 trials without pruning, where the searches were performed with Optuna. Additional settings for Optuna, such as using the log space are noted in the table. The target metric for maximization was the AUC.

## G Prompting

We use two prompt templates, one for zero-shot and one for few-shot inference. Both prompts in-

|                   | Space                | Info                | Longformer (ROC*)    | Longformer (BCE)     | LLaMA (ROC*)         | LLaMA (BCE)          |
|-------------------|----------------------|---------------------|----------------------|----------------------|----------------------|----------------------|
| Epochs            | [1, 30]              |                     | 25                   | 14                   | 30                   | 14                   |
| Learning Rate     | $[10^{-9}, 10^{-2}]$ | log space           | $3.6 \times 10^{-6}$ | $6.7 \times 10^{-5}$ | $3.7 \times 10^{-5}$ | $2.4 \times 10^{-4}$ |
| Pos. Weight       | [0.8, 30]            | BCE only            | -                    | 0.81                 | -                    | 29                   |
| $\gamma$          | [0.05, 0.75]         | ROC* only           | 0.59                 | -                    | 0.05                 | -                    |
| Sample Size       | [300, 10000]         | ROC*, step size=100 | 6600                 | -                    | 300                  | -                    |
| Batch Size (p.D.) | [4, 14]              | step size = 2       | 12                   | 8                    | 4                    | 12                   |

Table 15: Hyperparameter space and selected hyperparameters for DLU prediction models. We report the per device batch size. The number of devices was always set to 4.

|                                         | Space                | Info                | Longformer (ROC*)    | Longformer (BCE)     | LLaMA (ROC*)         | LLaMA (BCE)          |
|-----------------------------------------|----------------------|---------------------|----------------------|----------------------|----------------------|----------------------|
| Models finetuned only on CWI            |                      |                     |                      |                      |                      |                      |
| Epochs                                  | [1, 30]              |                     | 8                    | 11                   | 22                   | 11                   |
| Learning Rate                           | $[10^{-9}, 10^{-2}]$ | log space           | $7.0 \times 10^{-5}$ | $4.6 \times 10^{-5}$ | $1.1 \times 10^{-4}$ | $2.3 \times 10^{-5}$ |
| Pos. Weight                             | [0.8, 30]            | BCE only            | -                    | 29.9                 | -                    | 26.5                 |
| $\gamma$                                | [0.05, 0.75]         | ROC* only           | 0.69                 | -                    | 0.45                 | -                    |
| Sample size                             | [300, 10000]         | ROC*, step size=100 | 3400                 | -                    | 4200                 | -                    |
| Batch size (p.D.)                       | [8, 80]              | step size = 2       | 48                   | 10                   | 50                   | 72                   |
| Models finetuned on DLU and then on CWI |                      |                     |                      |                      |                      |                      |
| Epochs                                  | [1, 30]              |                     | 10                   | 21                   | 29                   | 8                    |
| Learning Rate                           | $[10^{-9}, 10^{-2}]$ | log space           | $1.7 \times 10^{-4}$ | $7.4 \times 10^{-5}$ | $8.0 \times 10^{-5}$ | $9.2 \times 10^{-5}$ |
| Pos. Weight                             | [0.8, 30]            | BCE only            | -                    | 12.72                | -                    | 23.54                |
| $\gamma$                                | [0.05, 0.75]         | ROC* only           | 0.09                 | -                    | 0.52                 | -                    |
| Sample size                             | [300, 10000]         | ROC*, step size=100 | 900                  | -                    | 4100                 | -                    |
| Batch size (p.D.)                       | [8, 80]              | step size = 2       | 36                   | 30                   | 52                   | 18                   |

Table 16: Hyperparameter space and selected hyperparameters for CWI prediction models. We report the per device batch size. The number of devices was always set to 4.

|                                              | Space                | Info                | Longformer (ROC*)    | Longformer (BCE)     | LLaMA (ROC*)         | LLaMA (BCE)          |
|----------------------------------------------|----------------------|---------------------|----------------------|----------------------|----------------------|----------------------|
| Models finetuned only on SEP task            |                      |                     |                      |                      |                      |                      |
| Epochs                                       | [1, 30]              |                     | 24                   | 10                   | 10                   | 6                    |
| Learning Rate                                | $[10^{-9}, 10^{-2}]$ | log space           | $3.1 \times 10^{-5}$ | $1.0 \times 10^{-5}$ | $8.6 \times 10^{-6}$ | $2.3 \times 10^{-5}$ |
| Pos. Weight                                  | [0.8, 30]            | BCE only            | -                    | 15.08                | -                    | 16.90                |
| $\gamma$                                     | [0.05, 0.75]         | ROC* only           | 0.34                 | -                    | 0.65                 | -                    |
| Sample size                                  | [300, 10000]         | ROC*, step size=100 | 2600                 | -                    | 9100                 | -                    |
| Batch size (p.D.)                            | [4, 44]              | step size = 2       | 36                   | 34                   | 38                   | 18                   |
| Models finetuned on DLU and then on SEP task |                      |                     |                      |                      |                      |                      |
| Epochs                                       | [1, 30]              |                     | 28                   | 26                   | 7                    | 1                    |
| Learning Rate                                | $[10^{-9}, 10^{-2}]$ | log space           | $2.1 \times 10^{-8}$ | $1.5 \times 10^{-9}$ | $1.6 \times 10^{-8}$ | $2.0 \times 10^{-6}$ |
| Pos. Weight                                  | [0.8, 30]            | BCE only            | -                    | 22.96                | -                    | 1.33                 |
| $\gamma$                                     | [0.05, 0.75]         | ROC* only           | 0.18                 | -                    | 0.62                 | -                    |
| Sample size                                  | [300, 10000]         | ROC*, step size=100 | 4300                 | -                    | 9900                 | -                    |
| Batch size (p.D.)                            | [4, 44]              | step size = 2       | 40                   | 16                   | 20                   | 32                   |

Table 17: Hyperparameter space and selected hyperparameters for SEP prediction models. We report the per device batch size. The number of devices was always set to 4.

struct the LLM to consider a paragraph of text and the learner’s English CEFR level. The the models are asked to predict which words the learner is likely unfamiliar with, and return these words in a JSON format. The zero-shot prompt directly provides the task instructions and desired output format, while the few-shot prompt includes three illustrative examples of different learners’ word choices in different paragraphs of text.

## G.1 Prompts

```
CLICK_DATA_APPROXIMATION_PROMPT = {'system':
    """ # Task Introduction You are an AI assistant
    now doing a language test. You will receive a
    paragraph of text. you will need to predict based
    on your user’s English level what words the user
    might click on(The user will click on the words
    he or she is not familiar with.
```

```
-
# About the user’s english level A1: Can write
personal information (e.g. likes and dislikes,
family, pets) using simple words, phrases and
sentences.
A2: Can write a series of simple phrases and
sentences, linked with words like 'and', 'but' and
'because'.
B1: Can write straightforward texts about
familiar topics or simple information and ideas.
Can link sentences into a connected text.
B2: Can write clear, detailed texts on different
subjects. Can use information and arguments from
other sources in their writing.
C1: Can write clear, well-structured, detailed
texts on complex subjects, showing the important
issues, giving examples and writing a conclusion
if appropriate. Can use the correct style of
writing relevant to the target reader.
C2: Can write clear, smoothly flowing, complex
```

texts in an appropriate and effective style. Can use a logical structure which helps the reader find the main points.

–  
# Expected Output Your answers should be formatted in JSON format with following keys and values: 1. output\_tokens: a list of tokens that you predict the user will click on, each token should appear only once 2. reason: a short string explaining your prediction of the tokens

NOTE: please make sure the output tokens are unique. each token in the list should appear only once """, 'user': ""

# task detail  
The user's english level is:  
{cefr\_level}  
The paragraph you need to predict on:  
{paragraph\_text}  
The tokens in the paragraph:  
{tokens}  
Respond only with valid JSON.

–  
"" }  
CLICK\_DATA\_APPROXIMATION\_FEWSHOT\_PROMPT =  
{'system': "" # Task Introduction You are an AI assistant now doing a language test. You will receive a paragraph of text. you will need to predict based on your user's English level what words the user might click on(The user will click on the words he or she is not familiar with.

–  
# About the user's english level  
A1: Can write personal information (e.g. likes and dislikes, family, pets) using simple words, phrases and sentences.

A2: Can write a series of simple phrases and sentences, linked with words like 'and', 'but' and 'because'.

B1: Can write straightforward texts about familiar topics or simple information and ideas. Can link sentences into a connected text.

B2: Can write clear, detailed texts on different subjects. Can use information and arguments from other sources in their writing.

C1: Can write clear, well-structured, detailed texts on complex subjects, showing the important issues, giving examples and writing a conclusion if appropriate. Can use the correct style of writing relevant to the target reader.

C2: Can write clear, smoothly flowing, complex texts in an appropriate and effective style. Can use a logical structure which helps the reader find the main points.

–  
# Expected Output Your answers should be formatted in JSON format with following keys and values: 1. output\_tokens: a list of tokens that you predict the user will click on, each token should appear only once

2. reason: a short string explaining your prediction of the tokens

NOTE: please make sure the output tokens are unique. each token in the list should appear only once

–  
# Examples Here are some examples from user of the same english level as the one you are going to mimic.

## Example1:  
{example1}

## Example2:  
{example2}  
## Example3:  
{example3}  
""", 'user': ""  
# task detail  
The user's english level is:  
{cefr\_level}  
The paragraph you need to predict on:  
{paragraph\_text}  
The tokens in the paragraph:  
{tokens}  
Respond only with valid JSON.  
–  
"" }

## H Significance Tests

We perform a two-sided permutation test using SciPy (Virtanen et al., 2020). We set permutation\_type='samples' and random\_state='1848'. The number of permutations is left at the default 9999. The test statistics and associated p-values can be found in tables 18 to 20.

The Bonferroni-correct p-value is 0.0027. We rounded the digits of the threshold using the floor, as this makes the significance test more restrictive.

|            | Metric | Statistic            | p-Value              |
|------------|--------|----------------------|----------------------|
| Longformer | AUC    | $2.9 \times 10^{-2}$ | $2.4 \times 10^{-1}$ |
| LLaMA      | AUC    | $6.3 \times 10^{-2}$ | $4.0 \times 10^{-4}$ |

Table 18: Significance tests for DLU. The tests concern whether using the ROC\* vs. the BEC loss changes the AUC.

|            | Metric | Loss | Statistic            | p-Value              |
|------------|--------|------|----------------------|----------------------|
| Longformer | AUC    | bce  | $4.8 \times 10^{-4}$ | $8.5 \times 10^{-1}$ |
| Longformer | F1     | bce  | $7.3 \times 10^{-3}$ | $4.7 \times 10^{-2}$ |
| Longformer | AUC    | roc  | $7.3 \times 10^{-4}$ | $9.0 \times 10^{-1}$ |
| Longformer | F1     | roc  | $2.6 \times 10^{-1}$ | $2.0 \times 10^{-4}$ |
| LLaMA      | AUC    | bce  | $4.2 \times 10^{-4}$ | $9.4 \times 10^{-1}$ |
| LLaMA      | F1     | bce  | $1.7 \times 10^{-2}$ | $4.0 \times 10^{-4}$ |
| LLaMA      | AUC    | roc  | $5.5 \times 10^{-3}$ | $7.7 \times 10^{-2}$ |
| LLaMA      | F1     | roc  | $1.2 \times 10^{-3}$ | $7.9 \times 10^{-1}$ |

Table 19: Significance tests for CWI task, testing whether models finetuned on DLU first perform differently on F1 or AUC.

## I Processing of CWI

The CWI dataset we used (Yimam et al., 2017, 2018) provides one data row for each labelled word, even if these words occur in the same sentences. To reduce training time and make the processing more similar to DLU, we treated these words as occurring together during training. For evaluation, we again made one prediction per input, as in the original

|            | Metric | Loss | Statistic            | p-Value              |
|------------|--------|------|----------------------|----------------------|
| LLaMA      | AUC    | bce  | $1.0 \times 10^{-2}$ | $3.9 \times 10^{-2}$ |
| LLaMA      | F1     | bce  | $1.3 \times 10^{-2}$ | $5.5 \times 10^{-2}$ |
| LLaMA      | AUC    | roc  | $1.8 \times 10^{-4}$ | $5.1 \times 10^{-1}$ |
| LLaMA      | F1     | roc  | $1.2 \times 10^{-3}$ | $7.6 \times 10^{-2}$ |
| Longformer | AUC    | bce  | $1.9 \times 10^{-3}$ | $3.9 \times 10^{-2}$ |
| Longformer | F1     | bce  | $4.0 \times 10^{-4}$ | $8.9 \times 10^{-1}$ |
| Longformer | AUC    | roc  | $8.4 \times 10^{-4}$ | $2.0 \times 10^{-1}$ |
| Longformer | F1     | roc  | $8.1 \times 10^{-4}$ | $8.0 \times 10^{-1}$ |

Table 20: Significance tests for SEP task, testing whether models finetuned on DLU first perform differently on F<sub>1</sub> or AUC.

CWI dataset for comparability. This might have affected our performance negatively, explaining some of the difference to the results reported by Smřdu et al. (2024).

## J Further Discussion of Results

Using an adaptive threshold for the F<sub>2</sub> (aF<sub>2</sub>) consistently improves the performance of the baseline further, which is not always the case for the transformer models. This suggests that the decision threshold for transformer models is context dependent and cannot be transferred between splits. Furthermore, it shows that the simple frequency baseline can be further improved with simple.

As a result of the different effect of the adaptive threshold, the highest F<sub>2</sub> value (23.4%) by a transformer model (Longformer ROC\*) is higher than the aF<sub>2</sub> (21%) of the frequency baseline, even though the baseline achieves the highest aF<sub>2</sub>.

## K Additional Results

In Section 7 we report results on the DLU train split, but as we release only the dev split with this paper, we report the results on this split in Table 22. The training method was the same as for the results on the test split.

The results might be affected by the same documents being repeated in the evaluation split (dev or test) because more than one user interacted with it. To investigate this effect, we also evaluated on these splits after removing all but one randomly selected version of each document, i.e. the look-up data for one random user per document. The results are shown in tables 24 and 25. The adaptive threshold for the aF<sub>2</sub> is the same as for the original evaluation.

|             |          | A              |                |                 |             | B              |                |                 |             | C              |                |                 |             | unk            |                |                 |             | All            |                |                 |             | D-read         |                |                 |             |
|-------------|----------|----------------|----------------|-----------------|-------------|----------------|----------------|-----------------|-------------|----------------|----------------|-----------------|-------------|----------------|----------------|-----------------|-------------|----------------|----------------|-----------------|-------------|----------------|----------------|-----------------|-------------|
|             |          | F <sub>1</sub> | F <sub>2</sub> | aF <sub>2</sub> | AUC         | F <sub>1</sub> | F <sub>2</sub> | aF <sub>2</sub> | AUC         | F <sub>1</sub> | F <sub>2</sub> | aF <sub>2</sub> | AUC         | F <sub>1</sub> | F <sub>2</sub> | aF <sub>2</sub> | AUC         | F <sub>1</sub> | F <sub>2</sub> | aF <sub>2</sub> | AUC         | F <sub>1</sub> | F <sub>2</sub> | aF <sub>2</sub> | AUC         |
| Gemma-Inst. | zeroshot | 10.3           | 15.1           | -               | 56.5        | 14.1           | 18.0           | -               | 57.6        | <b>13.4</b>    | 20.9           | -               | 64.1        | 9.1            | 14.3           | -               | 57.3        | 12.2           | 17.0           | -               | 57.7        | 2.2            | 4.6            | -               | 57.4        |
|             | fewshot  | 10.2           | 16.1           | -               | 57.4        | 12.5           | 17.8           | -               | 57.5        | 12.8           | <b>21.9</b>    | -               | 67.2        | 10.4           | 16.4           | -               | 59.1        | 11.7           | 17.6           | -               | 58.4        | -              | -              | -               | -           |
| LLaMA-Inst. | zeroshot | 8.7            | 16.4           | -               | 58.6        | 7.8            | 12.8           | -               | 53.0        | 5.3            | 10.0           | -               | 56.6        | 6.9            | 13.0           | -               | 57.2        | 7.6            | 13.5           | -               | 55.0        | 1.0            | 2.4            | -               | 56.1        |
|             | fewshot  | 8.3            | 15.1           | -               | 56.7        | 7.6            | 12.4           | -               | 52.7        | 4.5            | 8.9            | -               | 55.5        | 3.8            | 7.1            | -               | 49.7        | 6.7            | 11.7           | -               | 53.2        | -              | -              | -               | -           |
| LLaMA       | ROC*     | 0.0            | 0.0            | 8.0             | 79.3        | 0.0            | 0.0            | 5.4             | 66.7        | 0.0            | 0.0            | 0.0             | 70.2        | 0.0            | 0.0            | 7.5             | 70.2        | 0.0            | 0.0            | 5.9             | 69.9        | 0.0            | 0.0            | 1.4             | 76.2        |
|             | BCE      | 8.8            | 17.0           | 14.3            | 66.3        | 11.2           | 18.9           | 17.2            | 62.1        | 6.2            | 11.3           | 9.6             | 63.8        | 6.2            | 12.6           | 13.0            | 65.5        | 9.2            | 16.7           | 15.4            | 63.5        | <b>2.9</b>     | <b>5.8</b>     | 4.2             | 77.7        |
| Longformer  | BCE      | 0.0            | 0.0            | 18.9            | 73.3        | 0.0            | 0.0            | 15.8            | 69.8        | 0.0            | 0.0            | 9.9             | 67.2        | 0.0            | 0.0            | 15.1            | 73.7        | 0.0            | 0.0            | 15.9            | 70.8        | 0.0            | 0.0            | <b>8.6</b>      | 77.0        |
|             | ROC*     | 12.9           | 23.1           | 19.3            | 78.5        | 16.1           | 26.1           | 21.6            | 72.0        | 4.9            | 9.5            | 14.9            | 66.8        | 12.4           | 21.1           | 19.2            | 76.6        | 13.8           | 23.4           | 20.3            | 73.7        | 1.8            | 3.8            | 3.2             | 83.5        |
| Baseline    | freq.    | 8.7            | 18.9           | 24.7            | 75.8        | 9.6            | 20.6           | 23.1            | 71.4        | 4.2            | 9.9            | 10.8            | 72.3        | 5.7            | 12.9           | 16.6            | 72.2        | 8.1            | 17.7           | 21.0            | 72.5        | 0.9            | 2.2            | 3.3             | <b>84.9</b> |
|             | ens.     | <b>20.5</b>    | <b>30.2</b>    | <b>33.5</b>     | <b>85.6</b> | <b>17.4</b>    | <b>26.2</b>    | <b>27.9</b>     | <b>76.3</b> | 11.9           | 18.4           | <b>19.9</b>     | <b>82.0</b> | <b>13.9</b>    | <b>24.0</b>    | <b>22.0</b>     | <b>80.8</b> | <b>17.0</b>    | <b>26.1</b>    | <b>27.4</b>     | <b>79.3</b> | -              | -              | -               | -           |

Table 21: Prediction results on the DLU test split, but for the prompting model, we take all occurrences of a word listed by the prompted model to be looked-up. (Results on non-prompting models are unchanged.)

|             |          | A              |                |                 |             | B              |                |                 |             | C              |                |                 |             | unk            |                |                 |             | All            |                |                 |             |
|-------------|----------|----------------|----------------|-----------------|-------------|----------------|----------------|-----------------|-------------|----------------|----------------|-----------------|-------------|----------------|----------------|-----------------|-------------|----------------|----------------|-----------------|-------------|
|             |          | F <sub>1</sub> | F <sub>2</sub> | aF <sub>2</sub> | AUC         | F <sub>1</sub> | F <sub>2</sub> | aF <sub>2</sub> | AUC         | F <sub>1</sub> | F <sub>2</sub> | aF <sub>2</sub> | AUC         | F <sub>1</sub> | F <sub>2</sub> | aF <sub>2</sub> | AUC         | F <sub>1</sub> | F <sub>2</sub> | aF <sub>2</sub> | AUC         |
| Gemma-Inst. | zeroshot | 11.7           | 14.0           | -               | 54.7        | 9.9            | 13.3           | -               | 55.7        | 12.0           | 9.5            | -               | 52.2        | 13.0           | 15.2           | -               | 55.2        | 11.2           | 13.1           | -               | 54.4        |
|             | fewshot  | 10.8           | 12.5           | -               | 53.9        | 9.4            | 12.4           | -               | 55.1        | 9.7            | 7.5            | -               | 51.5        | 12.9           | 18.0           | -               | 56.3        | 10.6           | 12.8           | -               | 54.1        |
| LLaMA-Inst. | zeroshot | 8.9            | 9.4            | -               | 52.6        | 9.0            | 14.3           | -               | 56.6        | 15.1           | 16.1           | -               | 51.7        | 6.1            | 8.5            | -               | 49.7        | 9.4            | 12.6           | -               | 53.4        |
|             | fewshot  | 11.2           | 15.6           | -               | 55.1        | 6.1            | 10.4           | -               | 53.1        | 12.9           | 12.9           | -               | 51.0        | 9.1            | 13.2           | -               | 52.6        | 8.4            | 12.4           | -               | 52.7        |
| LLaMA       | BCE      | 15.4           | <b>25.4</b>    | 20.9            | 69.0        | 7.8            | 13.4           | 10.1            | 58.2        | 15.3           | 14.6           | 10.9            | 62.2        | 13.8           | 24.2           | 21.7            | 67.4        | 11.8           | 18.9           | 15.5            | 62.1        |
|             | ROC*     | 0.0            | 0.0            | 13.2            | 71.6        | 0.0            | 0.0            | 7.1             | 64.8        | 0.0            | 0.0            | 1.6             | 51.2        | 0.0            | 0.0            | 9.9             | 68.5        | 0.0            | 0.0            | 7.9             | 63.3        |
| Longformer  | BCE      | 0.0            | 0.0            | 22.0            | <b>73.3</b> | 0.0            | 0.0            | 16.1            | <b>71.1</b> | 0.0            | 0.0            | 9.3             | 56.8        | 0.0            | 0.0            | 17.8            | 72.9        | 0.0            | 0.0            | 16.3            | 68.3        |
|             | ROC*     | <b>17.0</b>    | 25.4           | 18.0            | 71.8        | 10.2           | 19.1           | 16.6            | 69.5        | 15.0           | 17.9           | 10.0            | 51.5        | 15.3           | 23.8           | 19.9            | 71.7        | 12.8           | 21.0           | 16.2            | 65.6        |
| Baseline    | freq.    | 9.8            | 20.6           | 22.4            | 63.2        | 6.5            | 14.6           | 17.0            | 68.3        | <b>22.9</b>    | <b>39.7</b>    | <b>37.7</b>     | 62.1        | 11.4           | 23.8           | 27.2            | 69.8        | 9.7            | 20.6           | 22.7            | 65.7        |
|             | ens.     | 14.7           | 23.3           | <b>23.5</b>     | 68.7        | <b>11.3</b>    | <b>20.1</b>    | <b>18.8</b>     | 69.2        | 22.5           | 24.0           | 31.2            | <b>65.1</b> | <b>21.7</b>    | <b>33.0</b>    | <b>31.7</b>     | <b>76.9</b> | <b>15.2</b>    | <b>23.8</b>    | <b>23.9</b>     | <b>69.0</b> |

Table 22: Prediction results on the DLU dev split. “aF2” stands for F2 with a adaptive threshold, as discussed in Section 5.

|             |          | A              |                |                 |             | B              |                |                 |             | C              |                |                 |             | unk            |                |                 |             | All            |                |                 |             |
|-------------|----------|----------------|----------------|-----------------|-------------|----------------|----------------|-----------------|-------------|----------------|----------------|-----------------|-------------|----------------|----------------|-----------------|-------------|----------------|----------------|-----------------|-------------|
|             |          | F <sub>1</sub> | F <sub>2</sub> | aF <sub>2</sub> | AUC         | F <sub>1</sub> | F <sub>2</sub> | aF <sub>2</sub> | AUC         | F <sub>1</sub> | F <sub>2</sub> | aF <sub>2</sub> | AUC         | F <sub>1</sub> | F <sub>2</sub> | aF <sub>2</sub> | AUC         | F <sub>1</sub> | F <sub>2</sub> | aF <sub>2</sub> | AUC         |
| Gemma-Inst. | zeroshot | 11.9           | 14.7           | -               | 55.0        | 8.8            | 12.1           | -               | 54.9        | 15.0           | 12.3           | -               | 53.3        | 13.5           | 17.3           | -               | 56.1        | 11.3           | 13.8           | -               | 54.6        |
|             | fewshot  | 11.2           | 14.8           | -               | 54.8        | 8.5            | 11.9           | -               | 54.7        | 12.7           | 10.2           | -               | 52.4        | 12.4           | 19.8           | -               | 57.3        | 10.7           | 14.3           | -               | 54.6        |
| LLaMA-Inst. | zeroshot | 10.1           | 12.4           | -               | 53.6        | 6.9            | 12.5           | -               | 55.1        | 21.4           | 26.8           | -               | 55.4        | 6.9            | 11.1           | -               | 49.5        | 9.4            | 14.8           | -               | 54.1        |
|             | fewshot  | 10.3           | 16.0           | -               | 54.9        | 4.9            | 9.3            | -               | 51.1        | 20.1           | 23.8           | -               | 54.6        | 8.7            | 14.5           | -               | 52.0        | 8.3            | 13.8           | -               | 52.7        |
| LLaMA       | BCE      | 15.4           | <b>25.4</b>    | 20.9            | 69.0        | 7.8            | 13.4           | 10.1            | 58.2        | 15.3           | 14.6           | 10.9            | 62.2        | 13.8           | 24.2           | 21.7            | 67.4        | 11.8           | 18.9           | 15.5            | 62.1        |
|             | ROC*     | 0.0            | 0.0            | 13.2            | 71.6        | 0.0            | 0.0            | 7.1             | 64.8        | 0.0            | 0.0            | 1.6             | 51.2        | 0.0            | 0.0            | 9.9             | 68.5        | 0.0            | 0.0            | 7.9             | 63.3        |
| Longformer  | BCE      | 0.0            | 0.0            | 22.0            | <b>73.3</b> | 0.0            | 0.0            | 16.1            | <b>71.1</b> | 0.0            | 0.0            | 9.3             | 56.8        | 0.0            | 0.0            | 17.8            | 72.9        | 0.0            | 0.0            | 16.3            | 68.3        |
|             | ROC*     | <b>17.0</b>    | 25.4           | 18.0            | 71.8        | 10.2           | 19.1           | 16.6            | 69.5        | 15.0           | 17.9           | 10.0            | 51.5        | 15.3           | 23.8           | 19.9            | 71.7        | 12.8           | 21.0           | 16.2            | 65.6        |
| Baseline    | freq.    | 9.8            | 20.6           | 22.4            | 63.2        | 6.5            | 14.6           | 17.0            | 68.3        | <b>22.9</b>    | <b>39.7</b>    | <b>37.7</b>     | 62.1        | 11.4           | 23.8           | 27.2            | 69.8        | 9.7            | 20.6           | 22.7            | 65.7        |
|             | ens.     | 14.7           | 23.3           | <b>23.5</b>     | 68.7        | <b>11.3</b>    | <b>20.1</b>    | <b>18.8</b>     | 69.2        | 22.5           | 24.0           | 31.2            | <b>65.1</b> | <b>21.7</b>    | <b>33.0</b>    | <b>31.7</b>     | <b>76.9</b> | <b>15.2</b>    | <b>23.8</b>    | <b>23.9</b>     | <b>69.0</b> |

Table 23: Prediction results on the DLU dev split, but for the prompting model, we take all occurrences of a word listed by the prompted model to be looked-up. (Results on non-prompting models are unchanged.)

|             |          | A              |                |                 |             | B              |                |                 |             | C              |                |                 |             | unk            |                |                 |             | All            |                |                 |             |
|-------------|----------|----------------|----------------|-----------------|-------------|----------------|----------------|-----------------|-------------|----------------|----------------|-----------------|-------------|----------------|----------------|-----------------|-------------|----------------|----------------|-----------------|-------------|
|             |          | F <sub>1</sub> | F <sub>2</sub> | aF <sub>2</sub> | AUC         | F <sub>1</sub> | F <sub>2</sub> | aF <sub>2</sub> | AUC         | F <sub>1</sub> | F <sub>2</sub> | aF <sub>2</sub> | AUC         | F <sub>1</sub> | F <sub>2</sub> | aF <sub>2</sub> | AUC         | F <sub>1</sub> | F <sub>2</sub> | aF <sub>2</sub> | AUC         |
| Gemma-Inst. | zeroshot | 9.6            | 11.6           | -               | 52.7        | 15.8           | 20.3           | -               | 59.2        | 0.0            | 0.0            | -               | 47.2        | 1.7            | 2.9            | -               | 48.0        | 9.3            | 13.0           | -               | 55.1        |
|             | fewshot  | 20.3           | 22.0           | -               | 59.1        | 14.4           | 17.9           | -               | 57.7        | 0.0            | 0.0            | -               | 47.8        | 6.8            | 11.7           | -               | 56.4        | 12.1           | 16.4           | -               | 57.4        |
| LLaMA-Inst. | zeroshot | 11.0           | 16.9           | -               | 54.7        | 10.5           | 18.5           | -               | 58.8        | 3.0            | 6.4            | -               | 56.5        | 4.4            | 8.4            | -               | 53.1        | 8.6            | 15.2           | -               | 57.1        |
|             | fewshot  | 12.4           | 16.0           | -               | 55.1        | 6.7            | 10.3           | -               | 51.8        | <b>6.8</b>     | <b>14.1</b>    | -               | 69.8        | 0.0            | 0.0            | -               | 43.4        | 5.9            | 9.5            | -               | 51.9        |
| LLaMA       | ROC**    | 8.3            | 7.2            | 7.2             | 78.0        | 17.5           | 14.1           | 14.1            | <b>74.8</b> | 0.0            | 0.0            | 0.0             | <b>73.9</b> | 4.9            | 5.3            | 5.3             | 61.4        | 11.5           | 10.0           | 10.0            | 73.8        |
|             | BCE      | 13.5           | 18.0           | 18.0            | 59.9        | 18.6           | 25.5           | 25.5            | 66.3        | 0.0            | 0.0            | 0.0             | 30.7        | <b>10.8</b>    | <b>19.8</b>    | <b>19.8</b>     | <b>78.6</b> | 14.3           | 21.3           | 21.3            | 66.5        |
| Longformer  | ROC**    | 18.6           | 22.7           | 22.7            | <b>78.9</b> | <b>19.9</b>    | <b>28.8</b>    | <b>28.8</b>     | 74.3        | 4.2            | 8.3            | <b>8.3</b>      | 64.1        | 4.8            | 7.2            | 7.2             | 70.9        | <b>15.1</b>    | <b>22.0</b>    | <b>22.0</b>     | <b>74.6</b> |
|             | BCE      | <b>26.9</b>    | <b>28.7</b>    | <b>28.7</b>     | 76.6        | 13.7           | 15.1           | 15.1            | 69.0        | 0.0            | 0.0            | 0.0             | 71.6        | 6.8            | 8.8            | 8.8             | 74.2        | 13.8           | 16.3           | 16.3            | 71.4        |

Table 24: Prediction results on test split when for each document only one user was randomly selected.

|             |          | A              |                |                 |             | B              |                |                 |             | C              |                |                 |             | unk            |                |                 |             | All            |                |                 |             |
|-------------|----------|----------------|----------------|-----------------|-------------|----------------|----------------|-----------------|-------------|----------------|----------------|-----------------|-------------|----------------|----------------|-----------------|-------------|----------------|----------------|-----------------|-------------|
|             |          | F <sub>1</sub> | F <sub>2</sub> | aF <sub>2</sub> | AUC         | F <sub>1</sub> | F <sub>2</sub> | aF <sub>2</sub> | AUC         | F <sub>1</sub> | F <sub>2</sub> | aF <sub>2</sub> | AUC         | F <sub>1</sub> | F <sub>2</sub> | aF <sub>2</sub> | AUC         | F <sub>1</sub> | F <sub>2</sub> | aF <sub>2</sub> | AUC         |
| Gemma-Inst. | zeroshot | 7.5            | 11.2           | -               | 53.7        | 4.1            | 5.7            | -               | 50.8        | <b>26.2</b>    | <b>21.7</b>    | -               | <b>58.5</b> | 0.0            | 0.0            | -               | 46.6        | 8.8            | 11.2           | -               | 53.7        |
|             | fewshot  | 5.1            | 7.6            | -               | 51.0        | 6.2            | 9.7            | -               | 53.5        | 0.0            | 0.0            | -               | 47.7        | 0.0            | 0.0            | -               | 47.3        | 4.4            | 6.0            | -               | 50.0        |
| LLaMA-Inst. | zeroshot | 8.3            | 14.3           | -               | 56.2        | 6.3            | 12.1           | -               | 56.0        | 14.8           | 19.4           | -               | 53.2        | 2.6            | 6.1            | -               | 59.0        | 6.9            | 12.8           | -               | 53.3        |
|             | fewshot  | 4.8            | 8.4            | -               | 50.1        | 4.9            | 9.3            | -               | 52.4        | 6.7            | 5.5            | -               | 50.6        | 3.0            | 6.4            | -               | 54.8        | 4.8            | 8.1            | -               | 49.6        |
| LLaMA       | ROC**    | 5.7            | 5.6            | 5.6             | 64.7        | 6.1            | 5.6            | 5.6             | 67.6        | 0.0            | 0.0            | 0.0             | 50.6        | <b>16.7</b>    | <b>20.8</b>    | <b>20.8</b>     | 76.2        | 5.0            | 4.3            | 4.3             | 61.0        |
|             | BCE      | 4.5            | 7.0            | 7.0             | 61.8        | 4.4            | 6.0            | 6.0             | 53.8        | 7.5            | 5.7            | 5.7             | 54.2        | 8.0            | 16.1           | 16.1            | <b>83.7</b> | 5.5            | 7.1            | 7.1             | 52.1        |
| Longformer  | ROC**    | <b>17.4</b>    | <b>20.0</b>    | <b>20.0</b>     | 71.3        | 13.3           | 20.3           | 20.3            | 68.5        | 13.7           | 15.6           | <b>15.6</b>     | 54.5        | 10.8           | 20.4           | 20.4            | 70.6        | 13.7           | <b>18.7</b>    | <b>18.7</b>     | 64.9        |
|             | BCE      | 13.0           | 15.0           | 15.0            | <b>71.7</b> | <b>18.0</b>    | <b>22.2</b>    | <b>22.2</b>     | <b>69.6</b> | 12.8           | 12.4           | 12.4            | 55.0        | 15.4           | 20.0           | 20.0            | 72.3        | <b>15.3</b>    | 17.2           | 17.2            | <b>66.6</b> |

Table 25: Prediction results on dev split when for each document only one user was randomly selected.
